# Supplementary material for: X-linked deletion of Crossfirre, Firre, and Dxz4 in vivo uncovers diverse phenotypes and combinatorial effects on autosomes
Source: PubMed Central journal article supplement (PMC11621363; doi:10.1038/s41467-024-54673-5), 2024-12-05
Supplement: 41467_2024_54673_MOESM3_ESM.pdf [file 41467_2024_54673_MOESM3_ESM.pdf]

### **Supplementary Data 1 Multi-omic and phenotypic data from X-linked mutants**

- a)** Sample information from E12.5 F1 embryos
- b)** Sample information from adult (6 weeks) body map
- c)** ATAC-seq analysis of male and female organs
- d)** Oligo information and Sanger sequencing for genotype verification of KO strains
- e)** Differential gene expression analysis in placenta
- f)** Allele-specific expression analysis in the placenta
- g)** Allele-specific single-cell expression analysis in the adult spleen
- h)** Differential gene expression analysis for the TKO bodymap
- i)** Significant differentially expressed genes in the TKO and Firre-Dxz4 bodymap
- j)** Differentially expressed genes in the TKO bodymap
- k)** Top 100 gene sets from gene set enrichment analysis of the TKO bodymap
- l)** Differentially expressed genes in the spleen of mutant strains
- m)** Shared differentially expressed genes in the spleen
- n)** Gene set enrichment analysis results in the spleen
- o-q)** German Mouse Clinic TKO phenotype results
- r-s)** Expression tables (TPM)
